# Supplementary material for: High-performance asymmetric supercapacitor made of NiMoO 4 nanorods@Co 3 O 4 on a cellulose-based carbon aerogel
Source: publisher site journal article supplement (doi:10.3762/bjnano.11.18), 2020-01-21
Supplement: Additional file 1 [file 2190-4286-11-18-S1.pdf]

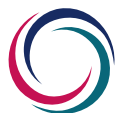

## Supporting Information

for

### **High-performance asymmetric supercapacitor made of NiMoO<sub>4</sub> nanorods@Co<sub>3</sub>O<sub>4</sub> on a cellulose-based carbon aerogel**

Meixia Wang, Jing Zhang, Xibin Yi, Benxue Liu, Xinfu Zhao and Xiaochan Liu

*Beilstein J. Nanotechnol.* **2020**, *11*, 240–251. doi:10.3762/bjnano.11.18

**Details of the preparation of the ASCs, photographs and SEM images of the cellulose aerogel, electrochemical tests and the LED photograph of the ASCs device**

### Preparation and characterization of the asymmetric supercapacitor (ASC)

The ASC device was assembled using NiMoO<sub>4</sub>@Co<sub>3</sub>O<sub>4</sub>/CA as the positive electrode and AC as the negative. A piece of cellulose paper as the separator soaked in the electrolyte was sandwiched between the two electrodes. The electrochemical tests of the ASC device (denoted as NiMoO<sub>4</sub>@Co<sub>3</sub>O<sub>4</sub>/CA//AC) was performed using 2.0 M KOH as alkaline electrolyte. Positive and negative charges should be balanced in an ASC as expressed by the formula  $q^+ = q^-$ , where  $q^+$  and  $q^-$  represent the charges stored in the positive and in the negative electrode, respectively. The following equation was used to calculate  $q$  [1]:

$$q = mC_m\Delta V \quad (S1)$$

When  $q^+ = q^-$ , the ratio between the masses of the positive electrode ( $m_+$ ) and the negative electrode ( $m_-$ ) were determined by the following equation [2]:

$$\frac{m_+}{m_-} = \frac{C_- \Delta V_-}{C_+ \Delta V_+} \quad (S2)$$

The device specific capacitance, energy density ( $E$ ) and power density ( $P$ ) are calculated from the charge–discharge curve using the following equations [3, 4]:

$$C = \frac{I \times \Delta t}{m \Delta V} \quad (S3)$$

$$E = \frac{C \times \Delta v}{2 \times 3.6} \quad (S4)$$

$$P = \frac{3600 \times E}{\Delta t} \quad (S5)$$

Where  $C$  (F/g) is the specific capacitance,  $I$  (A) is the current,  $\Delta t$  (s) is the discharge time,  $\Delta V$  (V) is the working voltage window,  $m$  (g) is the mass of the active material,  $E$  (Wh/kg) is the energy density and  $P$  (W/kg) is power density.

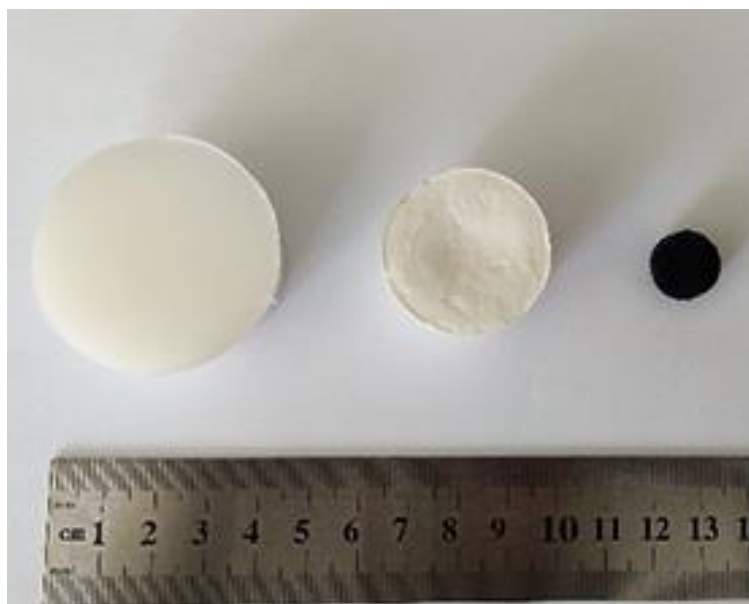

**Figure S1:** Digital photograph of the cellulose hydrogel, the cellulose aerogel and CA.

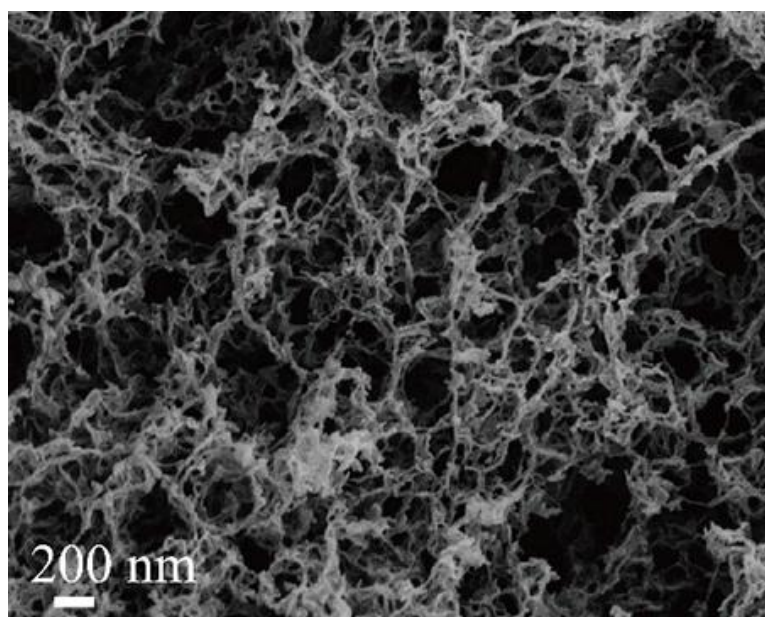

**Figure S2:** SEM of the cellulose aerogel.

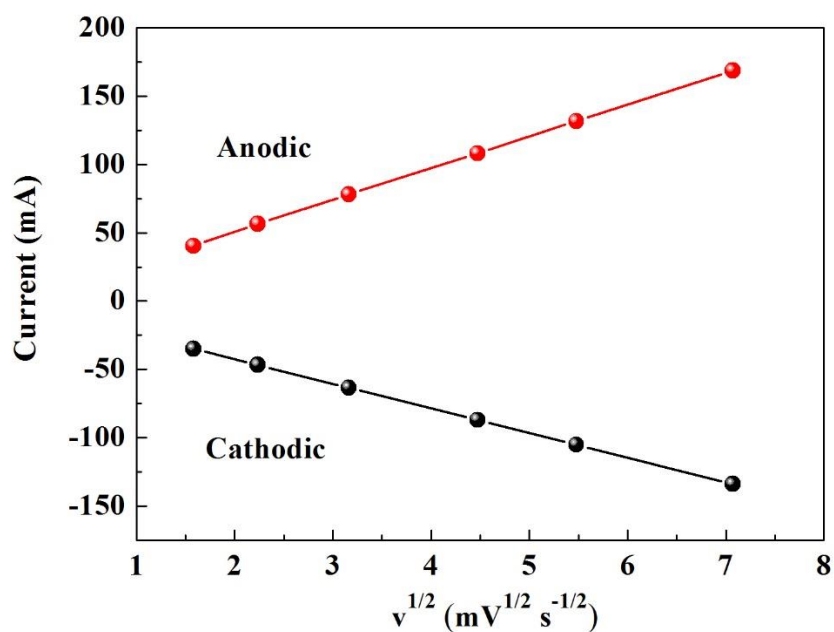

**Figure S3:** Linear fit of the experimental values of the current of the CV redox peaks as a function of  $v^{1/2}$  of the  $\text{NiMoO}_4@\text{Co}_3\text{O}_4/\text{CA}$  composite.

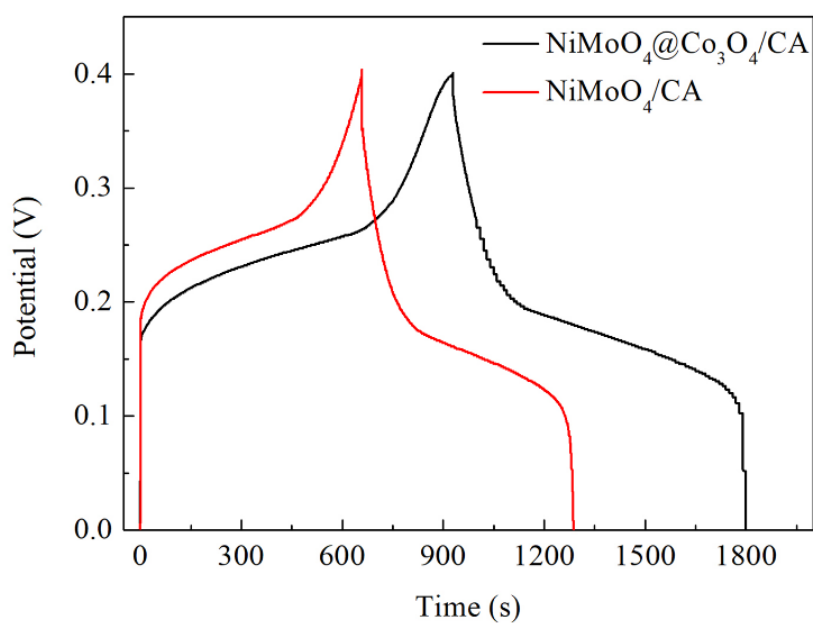

**Figure S4:** GCD curves of the  $\text{NiMoO}_4/\text{CA}$  and the  $\text{NiMoO}_4@\text{Co}_3\text{O}_4/\text{CA}$  at a current density of 0.5 A/g.

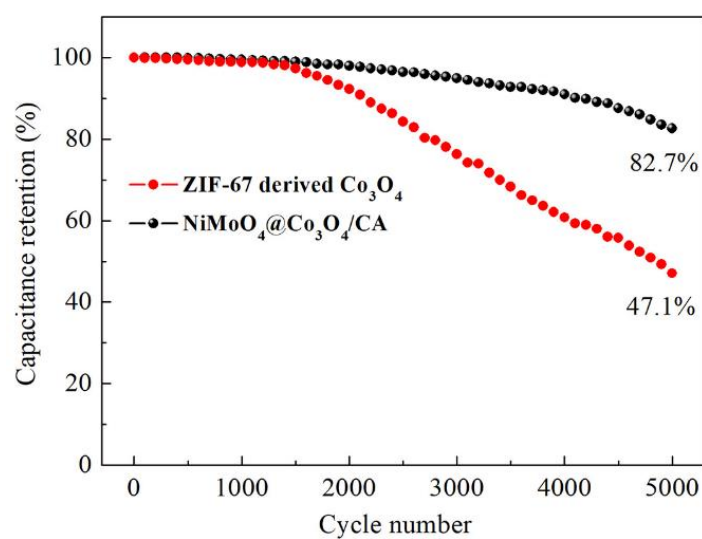

**Figure S5:** Cycle performance of ZIF-67 derived  $\text{Co}_3\text{O}_4/\text{CA}$  and  $\text{NiMoO}_4@\text{Co}_3\text{O}_4/\text{CA}$  at a current density of 0.5 A/g.

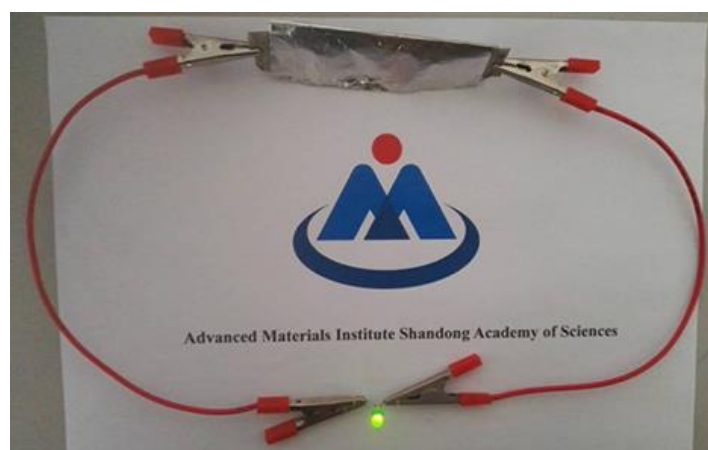

**Figure S6:** LED lighting photograph of the ASC device

## References

1. Chen S.; Chen H.; Li C.; Fan M.; Lv C.; Tian G.; Shu K. *J. Mater. Sci.*, **2017**, 52, 6687-6696. doi:10.1007/s10853-017-0903-2
2. Salunkhe R. R.; Lin J.; Malgras V.; Dou S. X.; Kim J. H.; Yamauchi Y. *Nano Energy*, **2015**, 11, 211-218. doi:10.1016/j.nanoen.2014.09.030

3. Liu M. C.; Xu Y.; Hu Y. X.; Yang Q. Q.; Kong L. B.; Liu W. W.; Niu W. J.; Chueh Y. L. *ACS Appl. Mater. Interfaces*, **2018**, *10*, 35571-35579. doi:10.1021/acsami.8b09085
4. Zhang J. T.; Jiang J. W.; Li H. L.; Zhao X. S. *Energy Environ. Sci.*, **2011**, *4*, 4009-4015. doi: 10.1039/C1EE01354H
